# Supplementary material for: Smartphone-based autofluorescence imaging to detect bacterial species on laboratory surfaces
Source: Royal Society of Chemistry journal article supplement (doi:10.1039/d2an00358a), 2022-01-01
Supplement: d2an00358a1.pdf [file d2an00358a1.pdf]

## SUPPLEMENTARY INFORMATION

Smartphone-Based Autofluorescence Imaging to Detect Bacterial Species on Laboratory Surfaces

Bailey C. Buchanan, Babak Safavinia, Lillian Wu, and Jeong-Yeol Yoon

Department of Biomedical Engineering, The University of Arizona, Tucson, Arizona 85721, United States

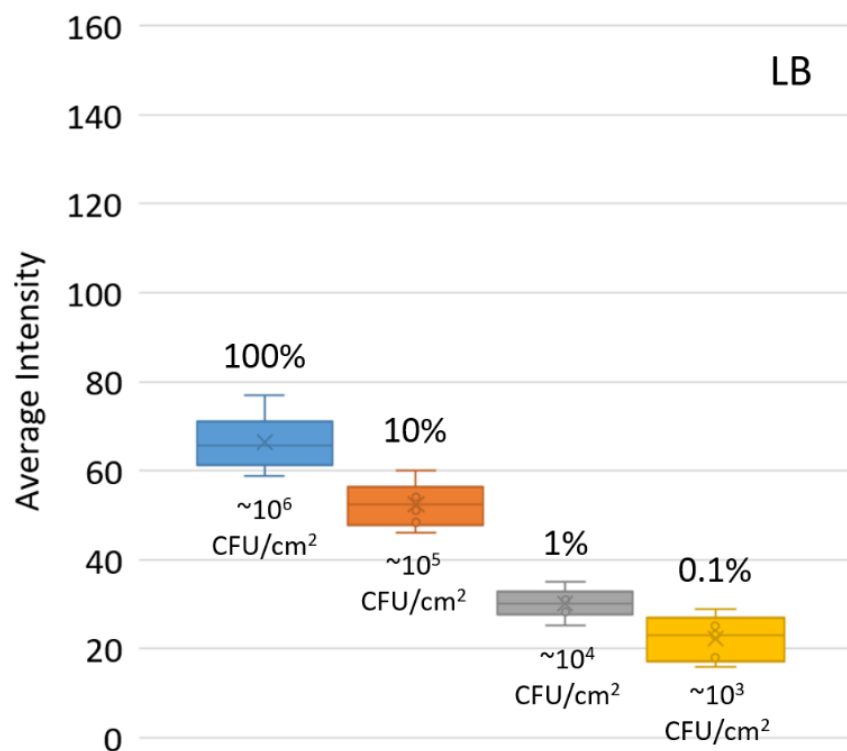

Supplementary Figure 1. Box and whisker plots of average intensities for LB droplets, serially diluted from 100% to 0.1%, corresponding to the bacterial dilutions from  $10^6$  to  $10^3$  CFU/cm<sup>2</sup>, placed on laboratory desks.
